# Supplementary material for: Synthesis, characterization and fabrication on a glassy carbon electrode of a tetra-iron substituted sandwich-type pentadecatungstodiarsenate heteropolyanionElectronic supplementary information (ESI) available: model of layer formation, CV of 4-ABA on a GCE and of QPVP-Os/4-ABA/GCE in pH 4.7 buffer, plots of Ed vs. log (i/id – i) and XRD of the title compound. See http://www.rsc.org/suppdata/nj/b2/b205766m/
Source: Royal Society of Chemistry journal article supplement (doi:10.1039/b205766m), 2003-02-26
Supplement: b205766m.doc [file b205766m.doc]

# Supplementary Information

**
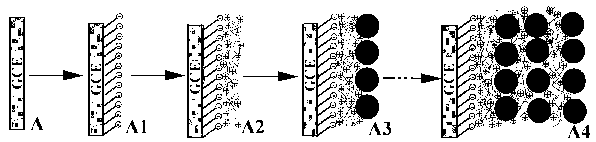
**

**S1**. Schematic illustration of deposition procedures and conceptual models of monolayer and multilayer consisted of POMs (large circles) and QPVP-Os (thin curves) on the kind of negatively charged precursor 4-ABA SAM. Depicted are various stages of the film formation: (A1) GCE/ABA; (A2) GCE/ABA/QPVP-Os; (A3) GCE/ABA/QPVP-Os/POM; and (A4) GCE/ABA/3QPVP-Os/3POMs.

**S2.** Cyclic voltammograms on a freshly polished GCE in LiClO4 ethanol

solution with 3 mM 4-ABA from n = 1 to 6 (shown from outside to inside curves), respectively. Scan rate: 10 mV s-1.


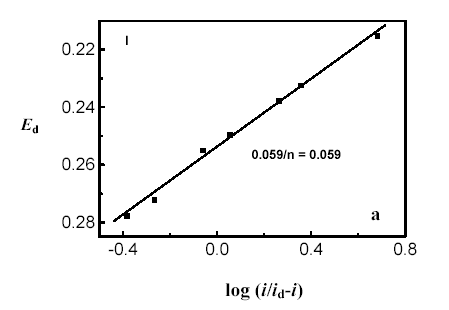

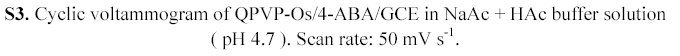


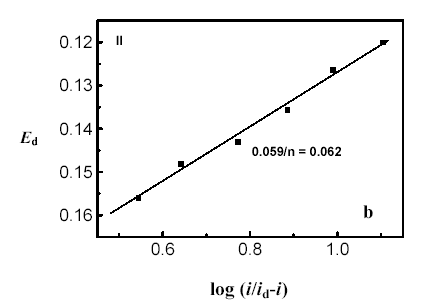


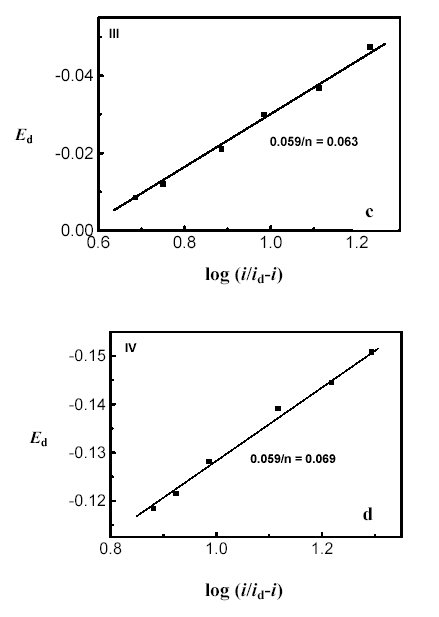


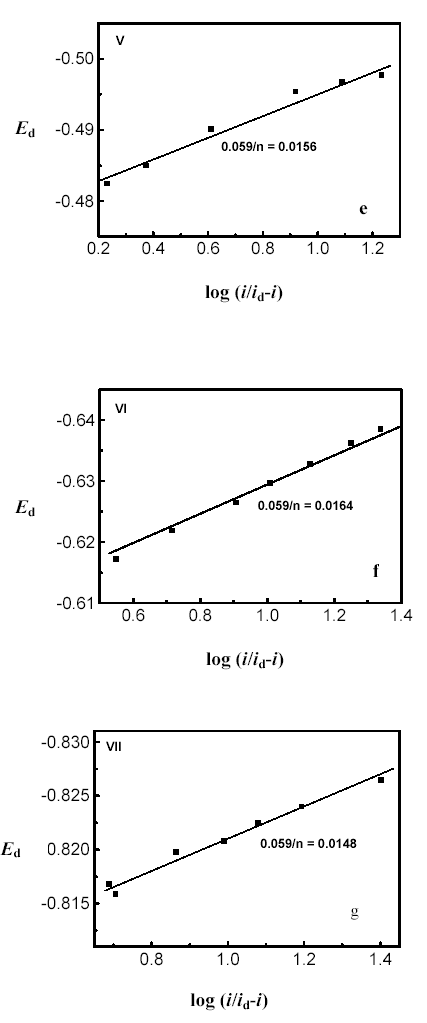


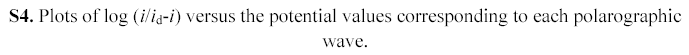


# S5. XRD pattern of the compound.
